# Supplementary material for: Genomic landscape and prognosis of patients with TP53-mutated non-small cell lung cancer
Source: PubMed Central journal article supplement — Ann Transl Med. 2022 Feb;10(4):188. doi: 10.21037/atm-22-412 (PMC8908146; doi:10.21037/atm-22-412), 2022-02
Supplement: atm-10-04-188-supplementary.pdf [file atm-10-04-188-supplementary.pdf]

A

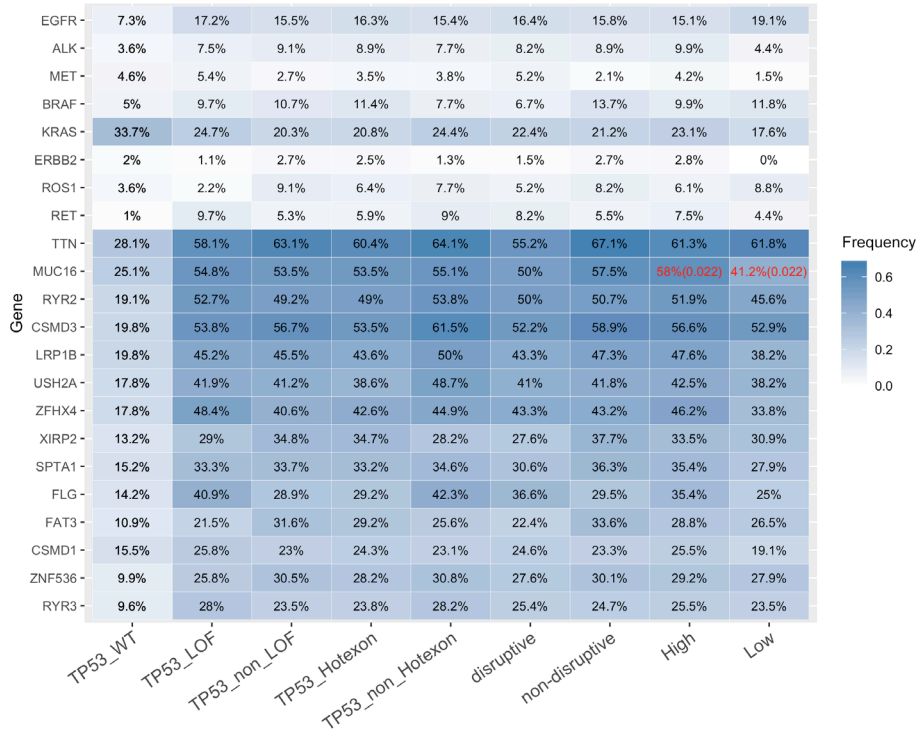

B

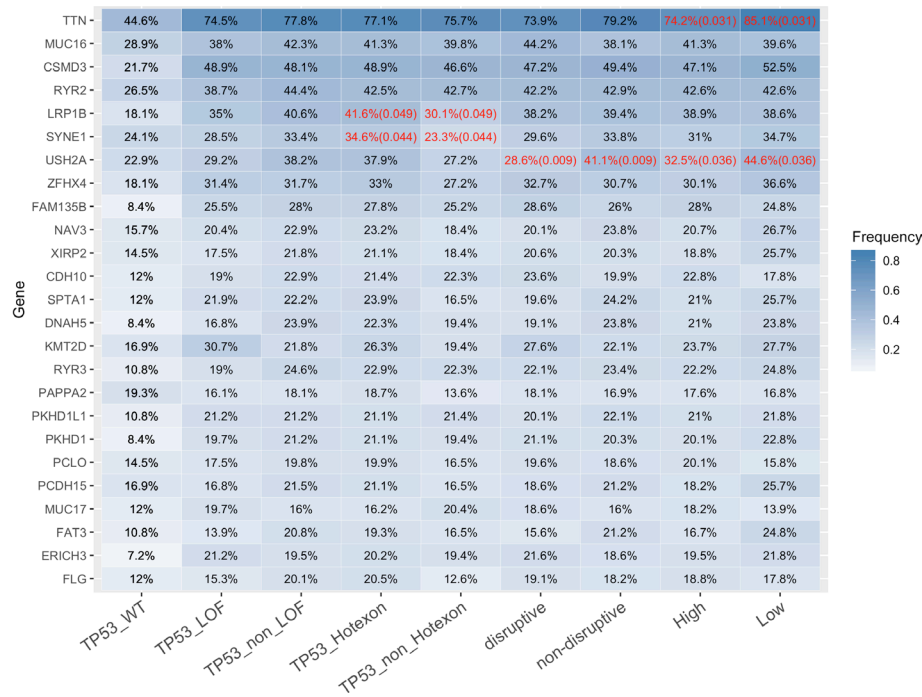

**Figure S1** Mutation rates of concomitant genomic alterations in carriers of different types of TP53 mutations (TP53-MUTs) among (A) patients with lung adenocarcinoma (LUAD) or (B) patients with lung squamous cell carcinoma (LUSC).

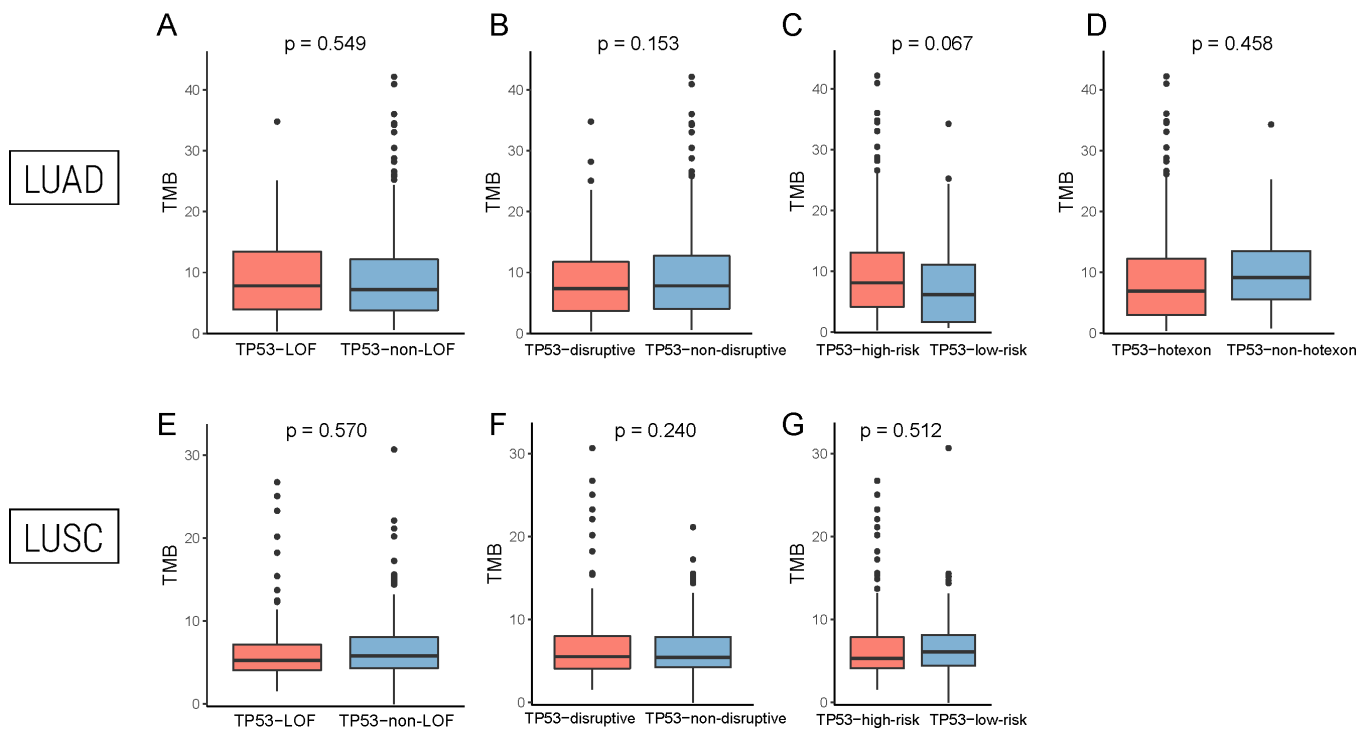

**Figure S2** The tumor mutation burden (TMB) levels of (A-D) patients with lung adenocarcinoma (LUAD) or (E-G) those with squamous cell carcinoma (LUSC) carrying the indicated subtypes of TP53 mutations (TP53-MUTs).

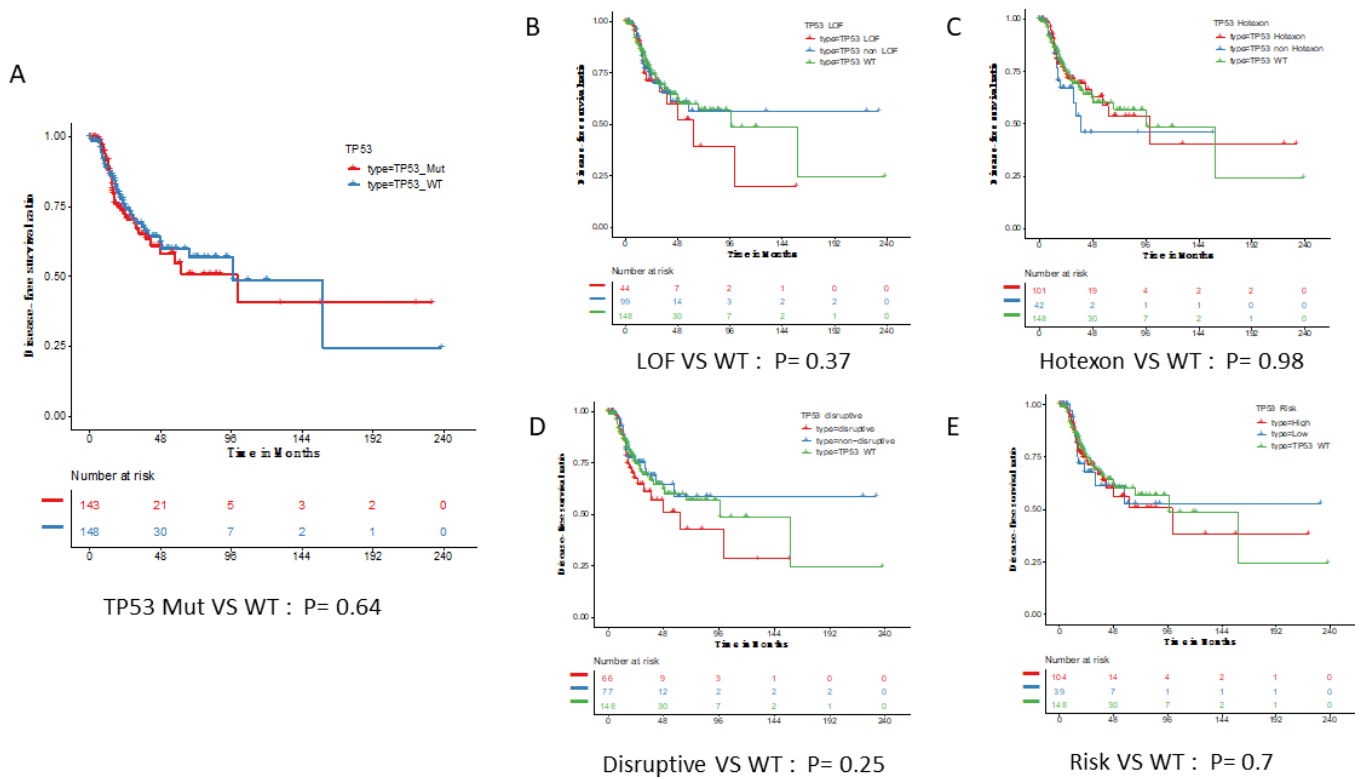

**Figure S3** Kaplan-Meier survival plots showing the disease-free survival (DFS) rates of patients with lung adenocarcinoma (LAUD), stratified by (A) TP53 mutation (TP53-MUT) status or (B-E) different classes of TP53-MUTSs.

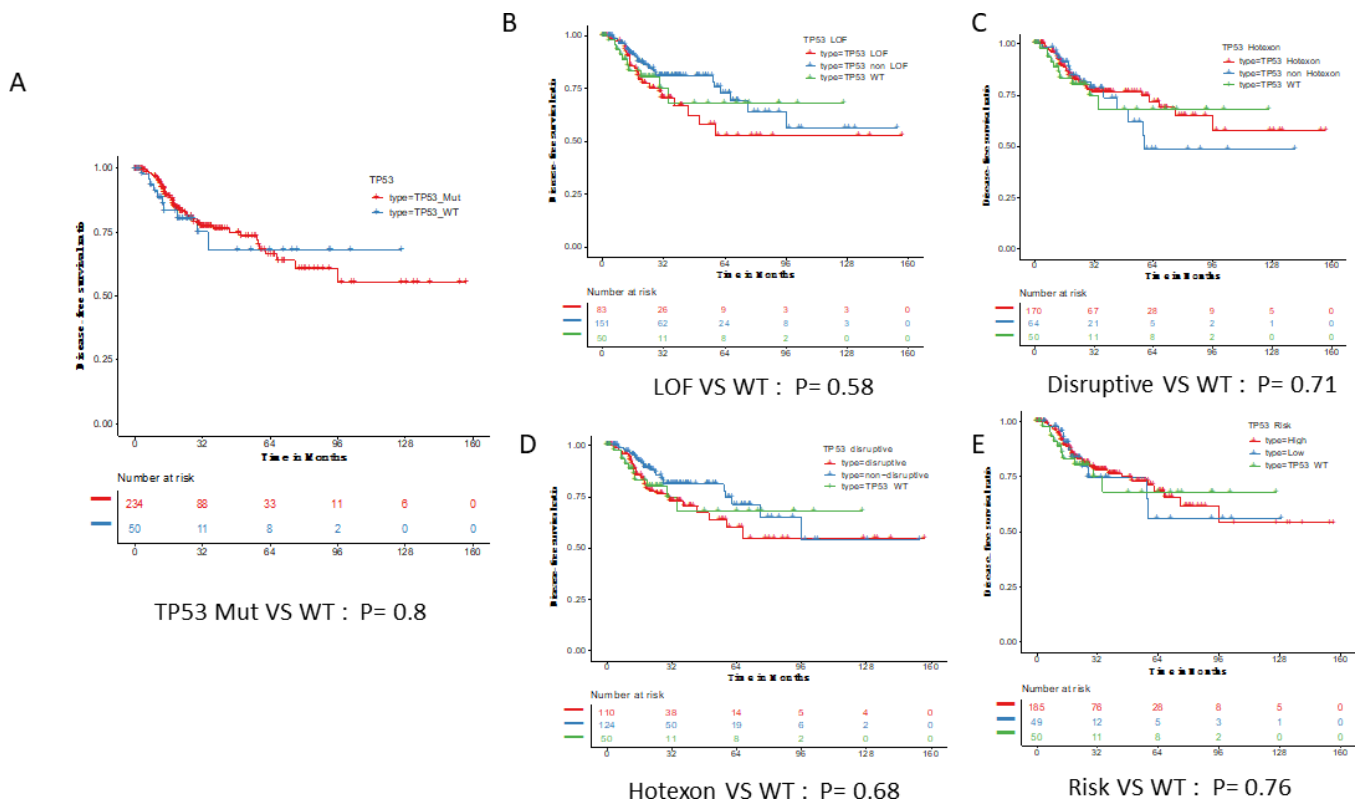

**Figure S4** Kaplan-Meier survival plots showing the disease-free survival (DFS) rates of patients with lung squamous cell carcinoma (LUSC), stratified by (A) TP53 mutation (TP53-MUT) status or (B-E) different classes of TP53-MUTs.

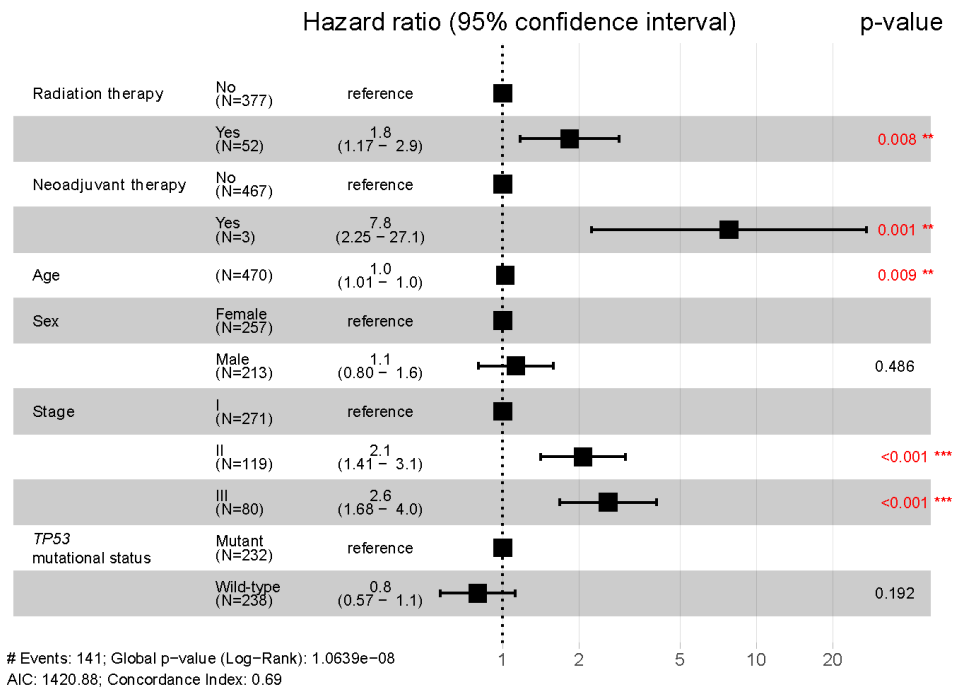

**Figure S5** Multivariate analysis of prognostic factors for overall survival (OS) in patients with resectable stage I-III lung adenocarcinoma (LAUD) (n=470). \*\*, P<0.01; \*\*\*, P<0.001
